# Supplementary material
Source: PubMed Central journal article supplement (PMC6822903)
Supplement: NIHMS1049715-supplement-Electronic_Supplementary_Material.pdf [file NIHMS1049715-supplement-Electronic_Supplementary_Material.pdf]

**Analytical and Bioanalytical Chemistry**

**Electronic Supplementary Material**

**Coupling matrix-assisted ionization with high resolution mass spectrometry and electron transfer dissociation to characterize intact proteins and post-translational modifications**

Bingming Chen, Christopher B. Lietz, Lingjun Li

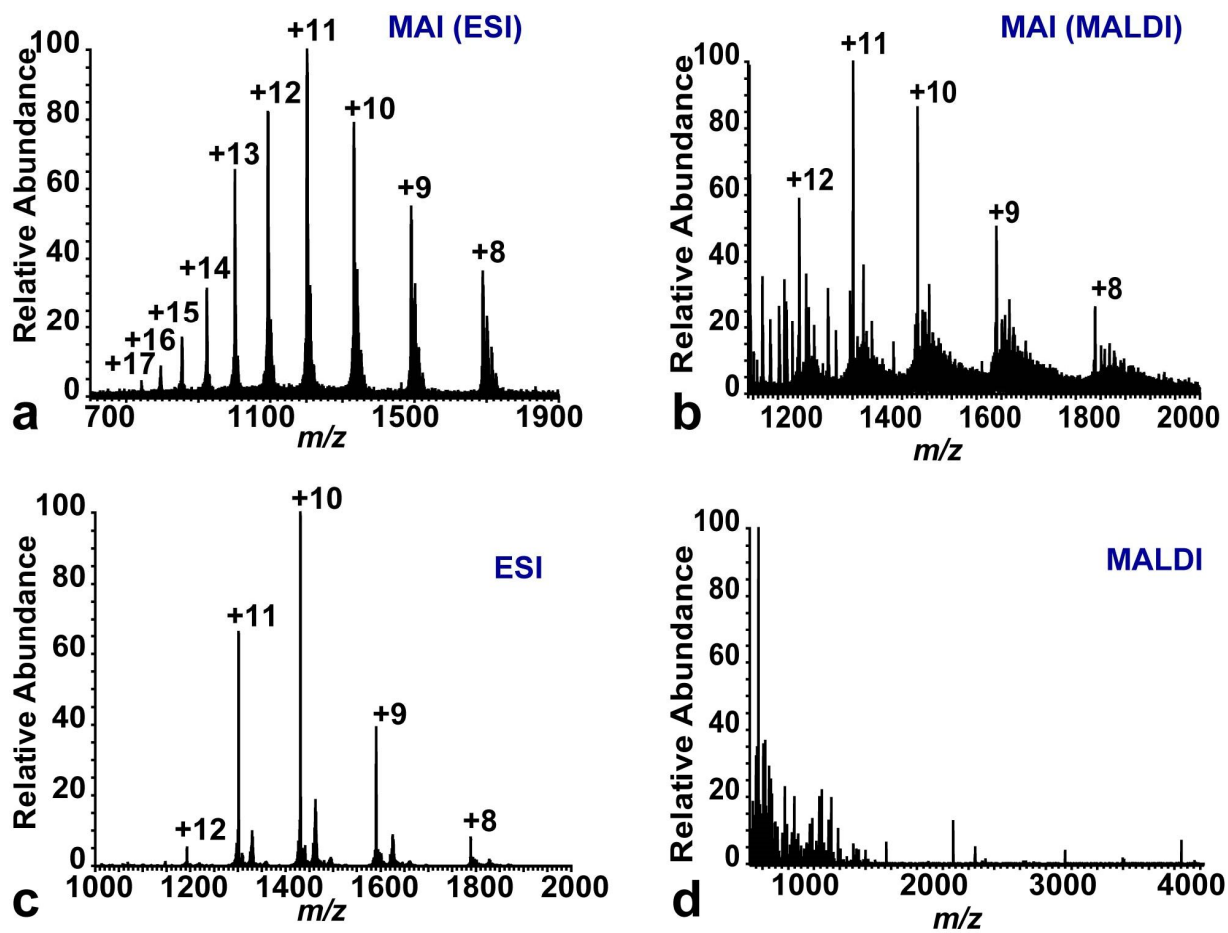

Fig. S1 Spectra comparison of lysozyme ionized by MAI (ESI) (a), MAI (MALDI) (b), ESI (c), and MALDI (d). The charge states were annotated on the spectra

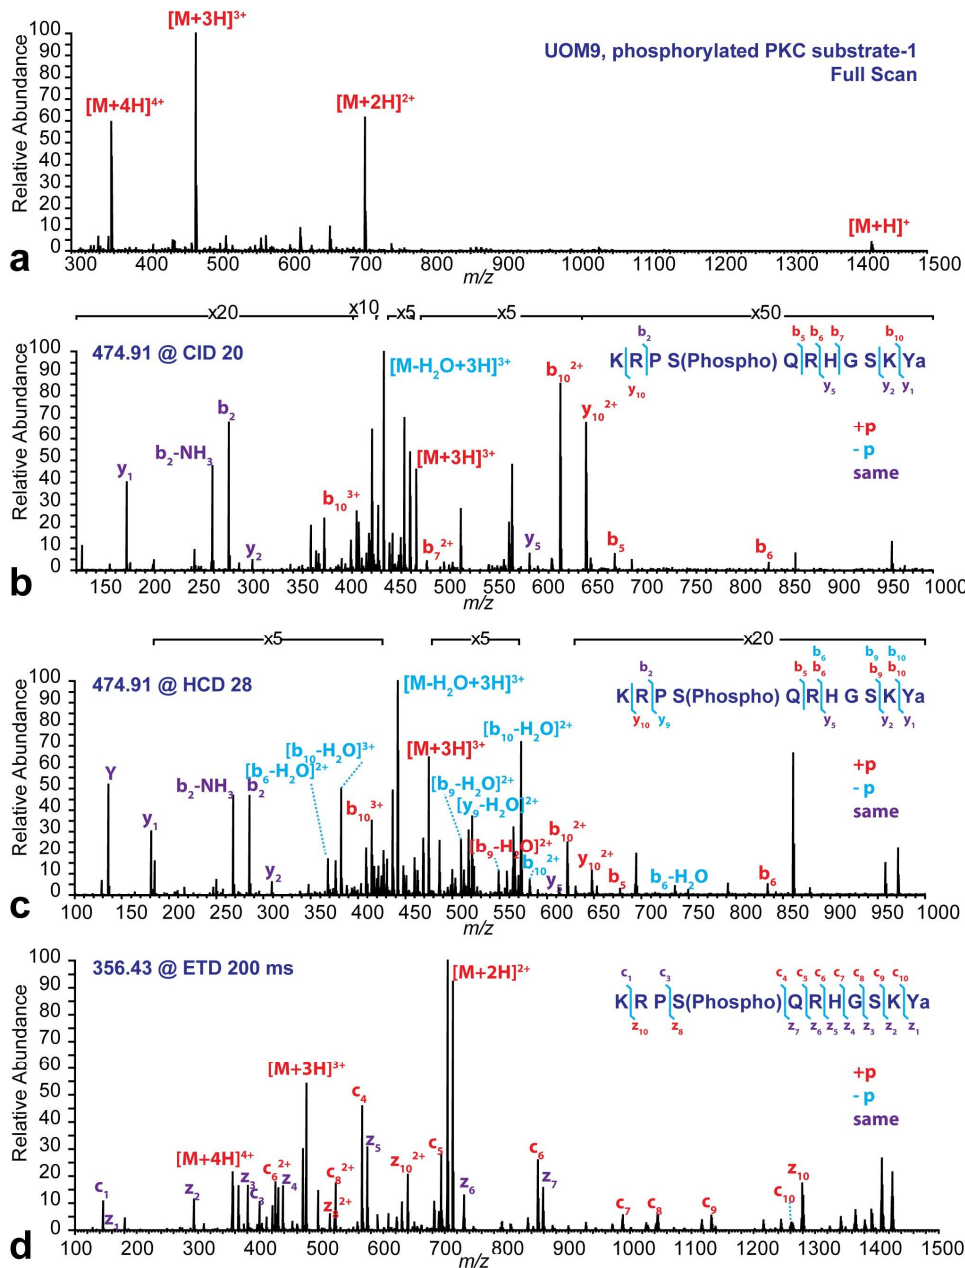

**Fig. S2** MAI full MS (a), CID (b), HCD (c) and ETD (d) spectra of the phosphopeptide UOM9 (phosphorylated PKC substrate). The detected ion species on the full scan were annotated on the spectrum. NCEs or activation time were labeled on the figure. The detected fragments under each condition were annotated on the spectra and listed on the peptide sequence. The red letters represent the fragments with phosphate group preserved, the blue letters represent the fragments with phosphate group detached and the purple letters represent the fragments before phosphate group

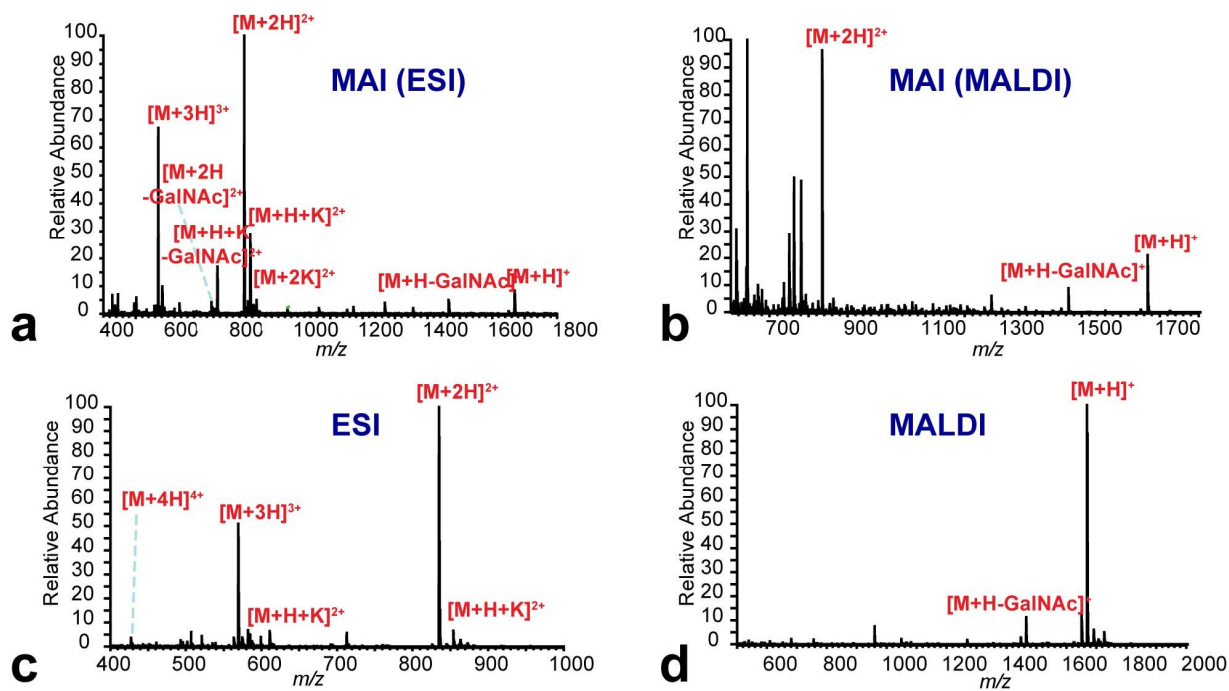

**Fig. S3** Spectra comparison of glycopeptide EPO ionized by MAI (ESI) (a), MAI (MALDI) (b), ESI (c) and MALDI (d). The detected ion species were annotated on the spectra

**Table S1** Proteins identified on MAI (MALDI) MS platform from rat brain protein extraction. Protein's theoretical mass, experimental mass and mass error were listed

| <b>Protein Name</b>                            | <b>Theoretical Mass (Da)</b> | <b>Experimental Mass (Da)</b> | <b>Mass Error (ppm)</b> |
|------------------------------------------------|------------------------------|-------------------------------|-------------------------|
| Acyl-CoA-binding protein                       | 9932.12                      | 9932.19                       | 7.05                    |
| ATP synthase-coupling factor 6                 | 8921.55                      | 8921.57                       | 2.24                    |
| Cytochrome c oxidase subunit 6b                | 9971.80                      | 9971.75                       | -5.01                   |
| Mitochondria import inner membrane translocase | 10276.08                     | 10276.05                      | -2.92                   |
| Superoxidase dismutase [Cu-Zn]                 | 15810.82                     | 15810.91                      | 5.69                    |
| Thymosin beta 4                                | 4960.48                      | 4960.57                       | 18.14                   |
| Ubiquitin                                      | 8560.63                      | 8560.47                       | -18.69                  |

**Table S2** Phospho-depleted and phosphorylated peptides detected from alpha-casein digest (both phospho-depleted and IMAC enriched fractions). The theoretical mass, experimental mass and mass error for tryptic digest peptides were listed

|                         | <b>Alpha-Casein Digest</b>           | <b>Theoretical Mass [M+H]<sup>+</sup></b> | <b>Experimental Mass [M+H]<sup>+</sup></b> | <b>Mass Error (ppm)</b> |
|-------------------------|--------------------------------------|-------------------------------------------|--------------------------------------------|-------------------------|
| <b>Phospho-depleted</b> | <b>23-37</b>                         | 1759.9450                                 | 1759.9476                                  | 1.49                    |
|                         | <b>38-49</b>                         | 1384.7300                                 | 1384.7320                                  | 1.47                    |
|                         | <b>106-115</b>                       | 1267.7045                                 | 1267.7060                                  | 1.18                    |
|                         | <b>140-166</b>                       | 3207.5932                                 | 3207.5971                                  | 1.20                    |
|                         | <b>148-166</b>                       | 2316.1369                                 | 2316.1394                                  | 1.08                    |
|                         | <b>209-214</b>                       | 748.3698                                  | 748.3707                                   | 1.16                    |
| <b>Phosphorylated</b>   | <b>52-73 (P56, 61, 63)</b>           | 2678.0229                                 | 2678.0251                                  | 0.84                    |
|                         | <b>58-73 (P61,63)</b>                | 1927.6916                                 | 1927.6925                                  | 0.45                    |
|                         | <b>58-94 (P61,63,79,81,82,83,90)</b> | 4629.5867                                 | 4629.6024                                  | 3.40                    |
|                         | <b>119-134 (P130)</b>                | 1951.9525                                 | 1951.9511                                  | 0.71                    |
|                         | <b>121-134 (P130)</b>                | 1660.7942                                 | 1660.7937                                  | 0.28                    |
|                         | <b>121-139 (P130)</b>                | 2257.1046                                 | 2257.1027                                  | 0.86                    |
